# Supplementary material
Source: Springer Nature journal article supplement (https://www.springermedizin.de/resource/supplementary/12905_2011_274_MOESM2_ESM.pdf/9518428)

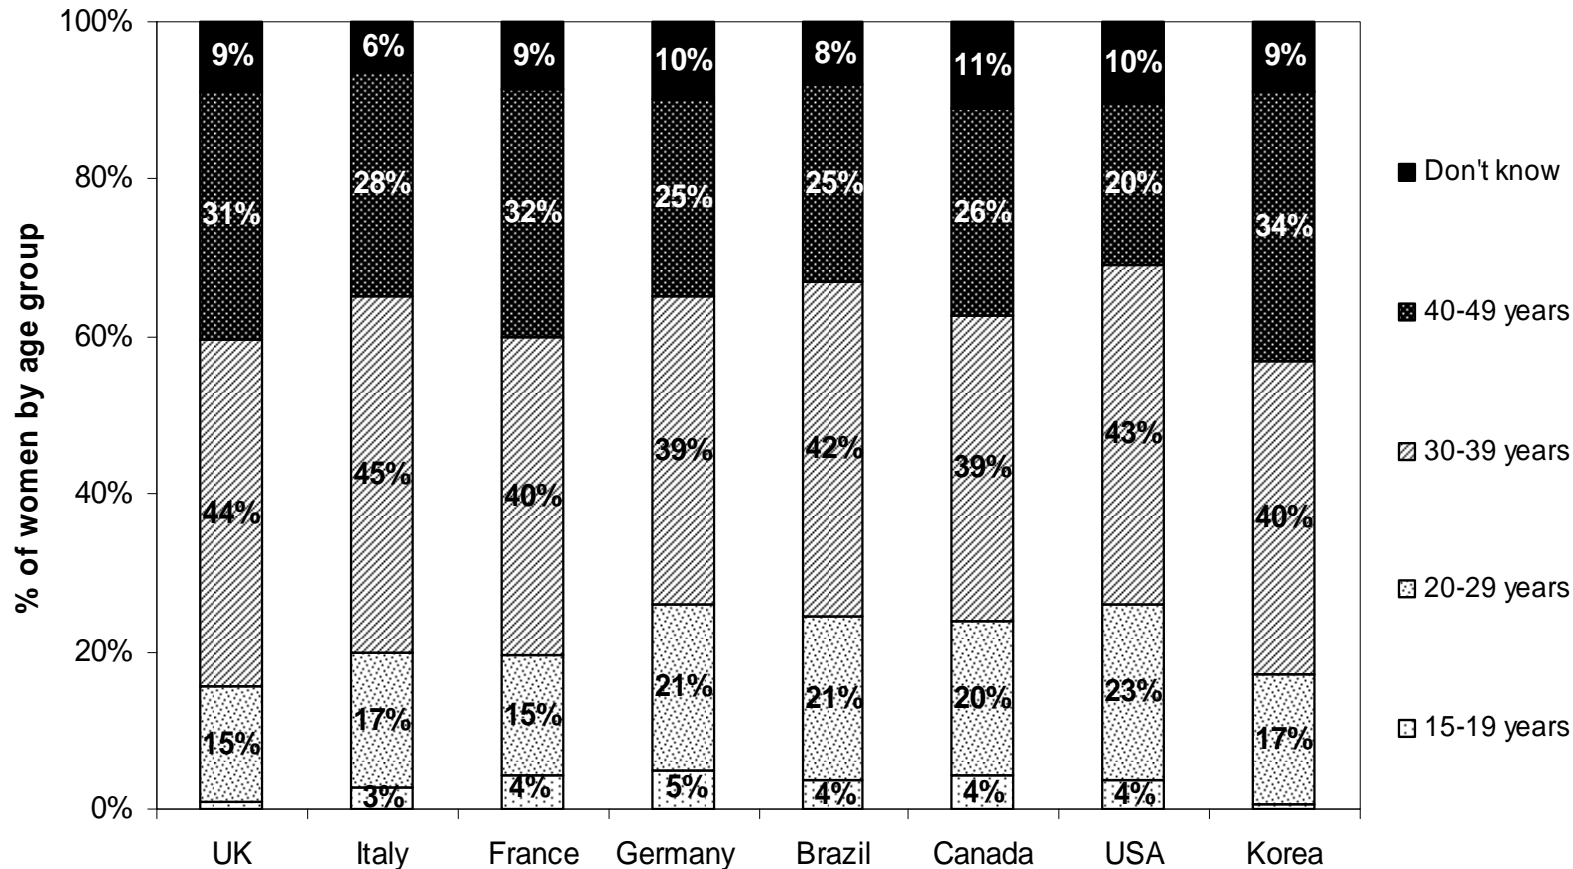

|                 |      |      |      |      |      |      |      |      |
|-----------------|------|------|------|------|------|------|------|------|
| <b>Mean age</b> | 35.9 | 34.7 | 34.9 | 33.5 | 33.8 | 34.3 | 33.7 | 36.1 |
| <b>SD</b>       | ±6.8 | ±7.3 | ±8.0 | ±8.4 | ±7.8 | ±8.0 | ±8.0 | ±6.9 |

Supplement: MOESM2 [file 9518428]
